# Supplementary material for: Environmentally responsive amino acid-bioconjugated dynamic covalent copolymer as a versatile scaffold for conjugation
Source: Royal Society of Chemistry journal article supplement (doi:10.1039/c5ra00192g), 2015-01-01
Supplement: c5ra00192g1.pdf [file c5ra00192g1.pdf]

## **Supporting Information**

### **Environmentally Responsive Amino Acid-Bioconjugated Dynamic Covalent Copolymer as a Versatile Scaffold for Conjugation**

Lin Wang, Li Liu,\* Libin Wu, Lingzhi Liu, Xiaobei Wang, Shixia Yang, Hanying Zhao  
Key Laboratory of Functional Polymer Materials, Ministry of Education, Institute of Polymer Chemistry, College of Chemistry, Collaborative Innovation Center of Chemical Science and Engineering (Tianjin), Nankai University, Tianjin 300071, P. R. China.

Tel&Fax: (+86) 22-23501443

E-mail: [nkliuli@nankai.edu.cn](mailto:nkliuli@nankai.edu.cn).

**Reaction of an aromatic bisaldehyde compound and L-tyrosine methyl ester.**

The aromatic bisaldehyde compound **1** (3.0 mg, 10  $\mu\text{mol}$ ) and L-tyrosine methyl ester (4.6 mg, 20  $\mu\text{mol}$ ) were dissolved in  $d_6$ -DMSO (0.5 mL) to give the solution. To the solution, DCl (1.5  $\mu\text{L}$ , 20 wt%) was added. The reaction was carried out at 60 °C.  $^1\text{H}$  NMR spectroscopy was measured at specified intervals.

**Reaction of an aromatic bisaldehyde compound and hydrazides**

The aromatic bisaldehyde compound **1** (3.0 mg, 10  $\mu\text{mol}$ ) and L-tyrosine hydrazide (3.9 mg, 20  $\mu\text{mol}$ ) or acethydrazide (1.5 mg, 20  $\mu\text{mol}$ ) were dissolved in  $d_6$ -DMSO (0.5 mL) to give the solution. To the solution, DCl (1.5  $\mu\text{L}$ , 20 wt%) was added. The reaction was carried out at 60 °C.  $^1\text{H}$  NMR spectroscopy was measured at specified intervals.

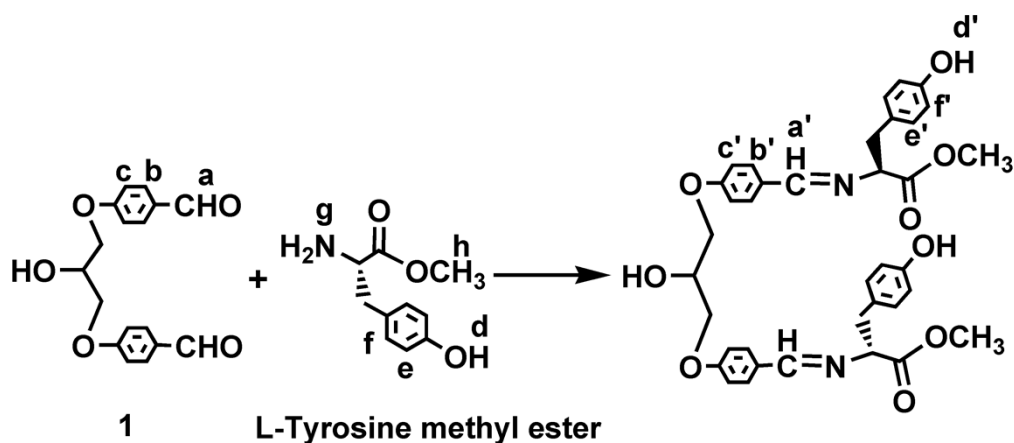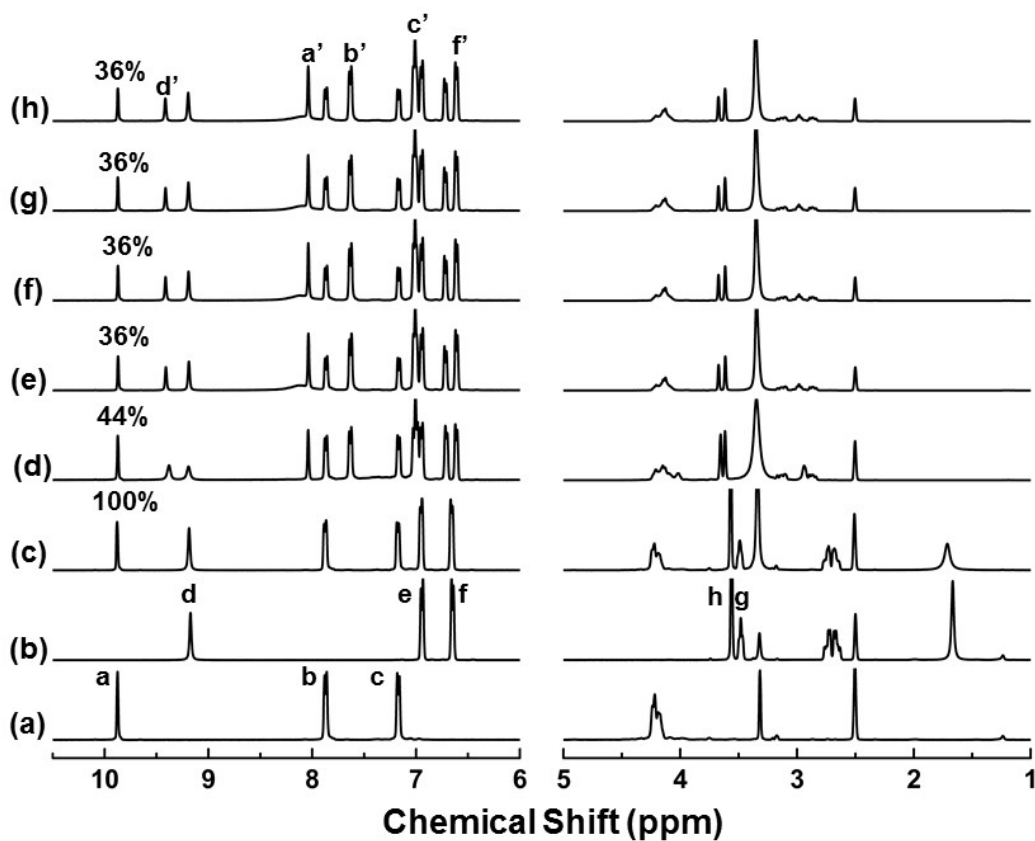

**Figure S1.** Imine bond formation. Partial  $^1\text{H}$  spectrum in  $d_6$ -DMSO of a solution of (a) dialdehyde compound **1**, (b) L-tyrosine methyl ester, (c)-(h) solutions of **1** and L-tyrosine methyl ester (aldehyde/amine = 1:1 (molar ratio),  $d_6$ -DMSO+DCI) at specified intervals: (c) 0 h, (d) 1 h, (e) 2 h, (f) 6.5 h, (g) 12 h, (h) 24 h.

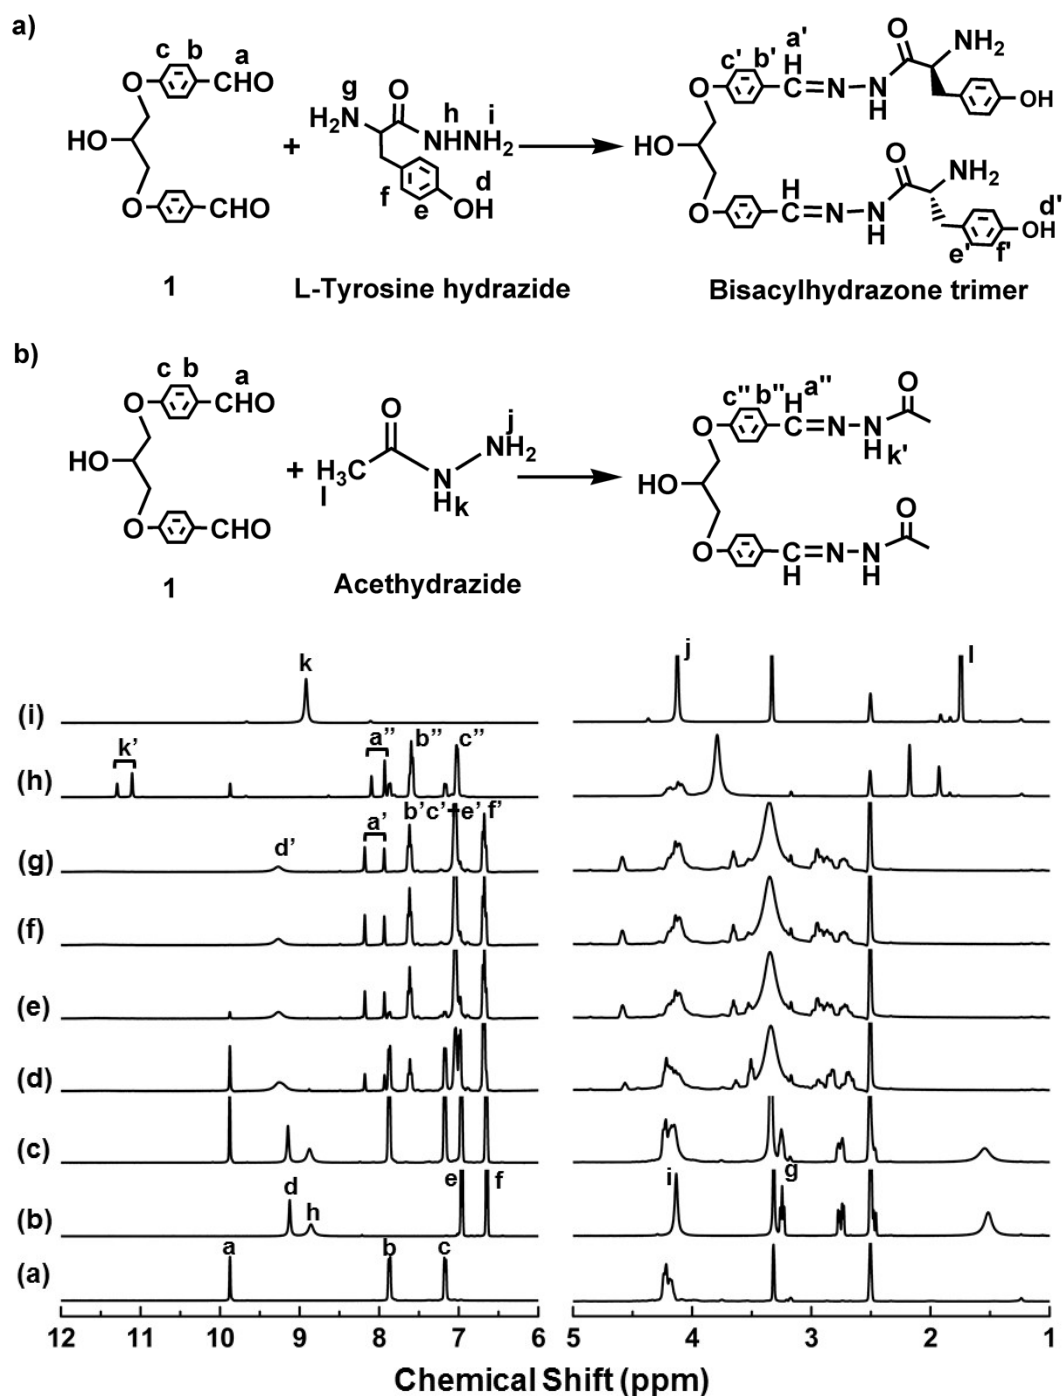

**Figure S2.** Acylhydrazone bond formation. Partial  $^1\text{H}$  spectrum in  $d_6$ -DMSO of a solution of (a) dialdehyde compound **1**, (b) L-tyrosine hydrazide, (c)-(g) solutions of **1** and L-tyrosine hydrazide (aldehyde/hydrazide = 1:1 (molar ratio), DCl as the catalyst) at specified intervals: (c) 0 h, (d) 1 h, (e) 6.5 h, (f) 12 h, (g) 24 h. (h) solution of **1** and acethydrazide (aldehyde/hydrazide = 1:1 (molar ratio), DCl as the catalyst), (i) acethydrazide.

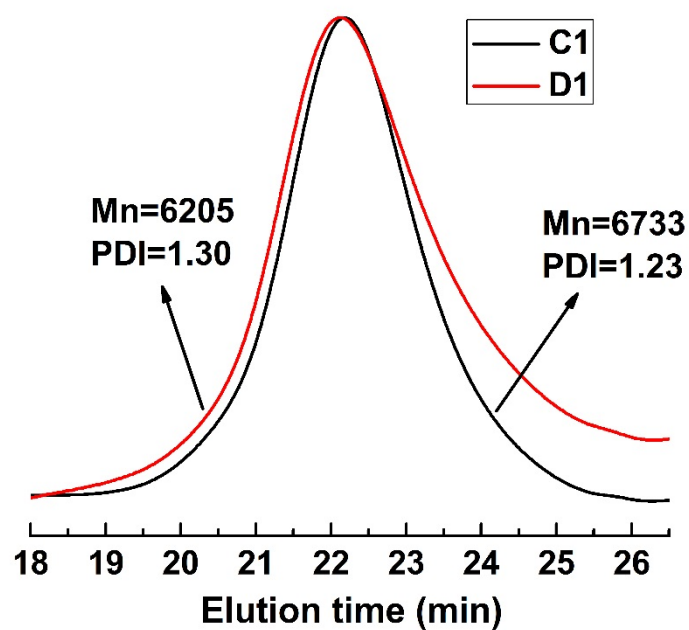

**Figure S3.** GPC curves of C1 and D1.

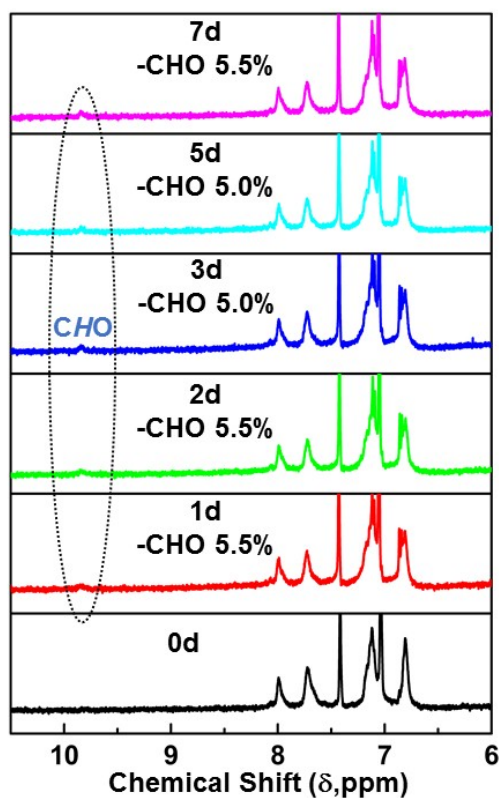

**Figure S4.** Partial  $^1\text{H}$  NMR spectra of D1 in  $\text{D}_2\text{O}/\text{DCl}$  recorded at specified intervals (pD = 5).

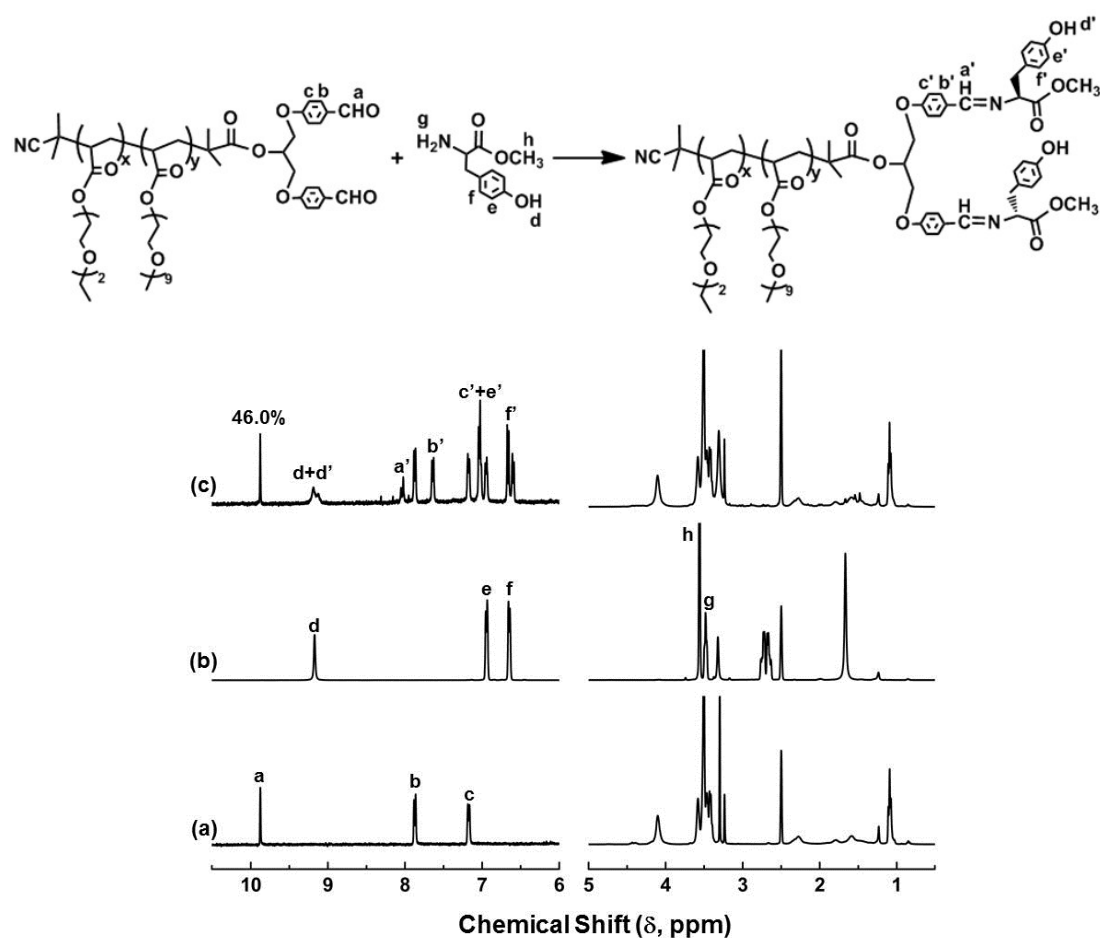

**Figure S5.** Partial  $^1\text{H}$  NMR spectra of (a) copolymer **C1**, (b) L-tyrosine methyl ester, (c) polymer sample obtained via the condensation of **C1** and L-tyrosine methyl ester after 24 reaction in the aqueous solution of pH 5.

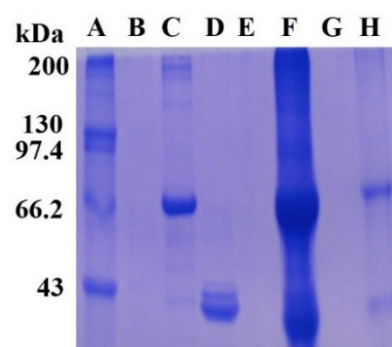

**Figure S6.** SDS-PAGE analysis of the chain exchange reaction of biodynamer-BSA bioconjugate with HP. Line A: protein maker; Line C: BSA; Line D: HRP; Line F: biodynamer-BSA; Line H: after chain exchange reaction.
